# Supplementary material for: Cannabidiol-induced crosstalk of apoptosis and macroautophagy in colorectal cancer cells involves p53 and Hsp70
Source: Springer Nature journal article supplement (doi:10.1038/s41420-023-01578-9), 2023-08-05

130kd  
110kd  
70kd  
55kd  
40kd  
  
35kd  
25kd  
  
15kd

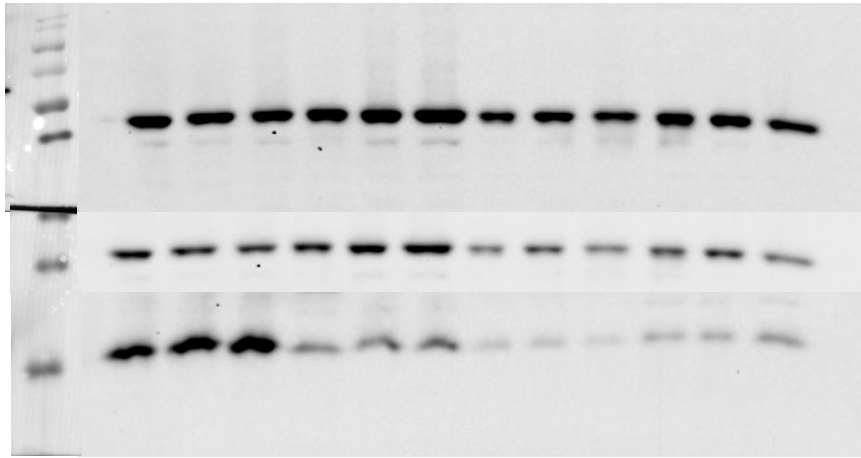

Actin

CDK2

p21

130kd  
110kd  
70kd  
  
55kd  
40kd  
  
35kd  
25kd  
  
15kd

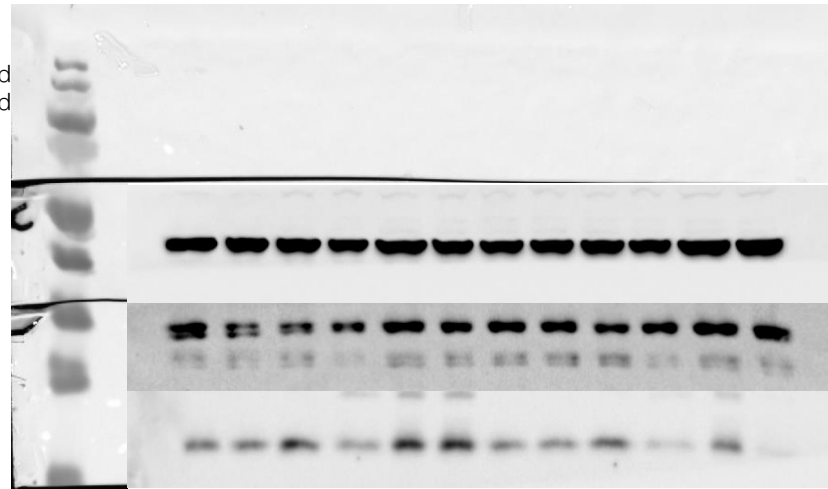

Actin

CDK2

p21

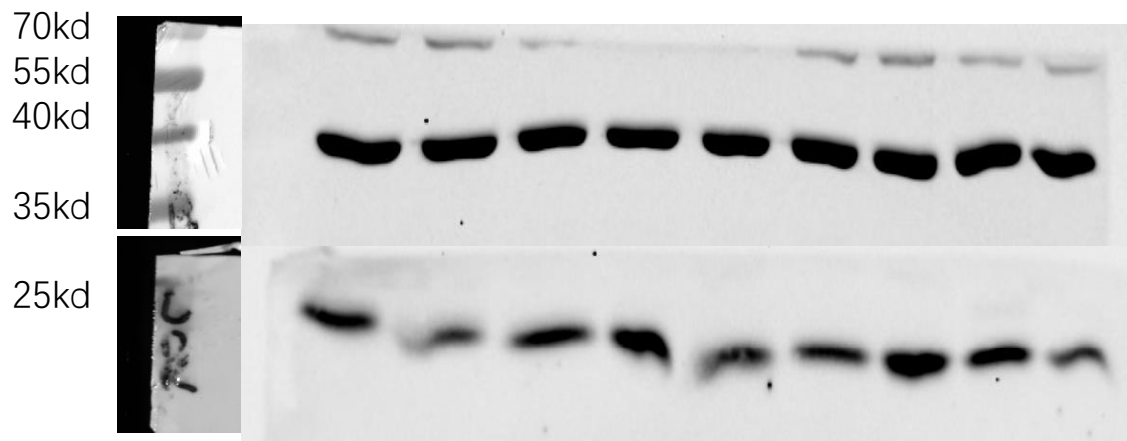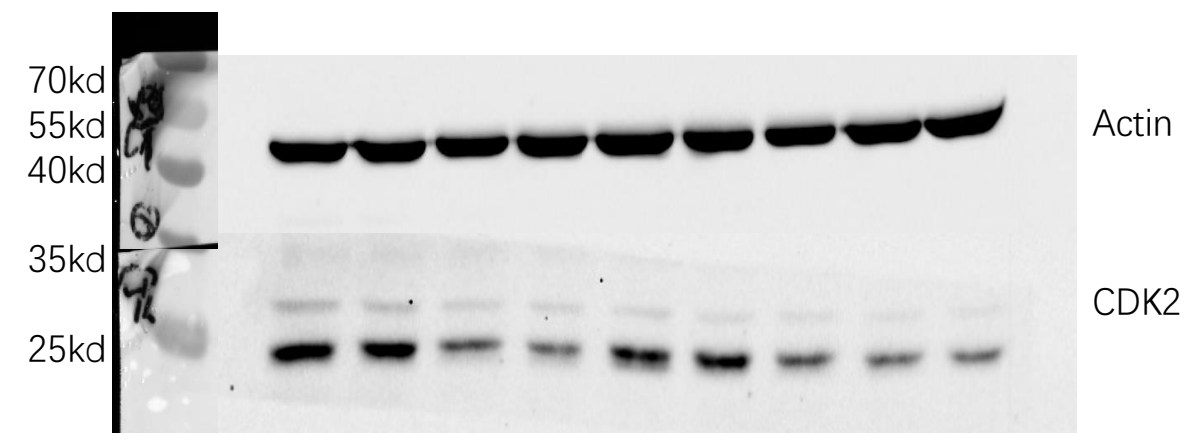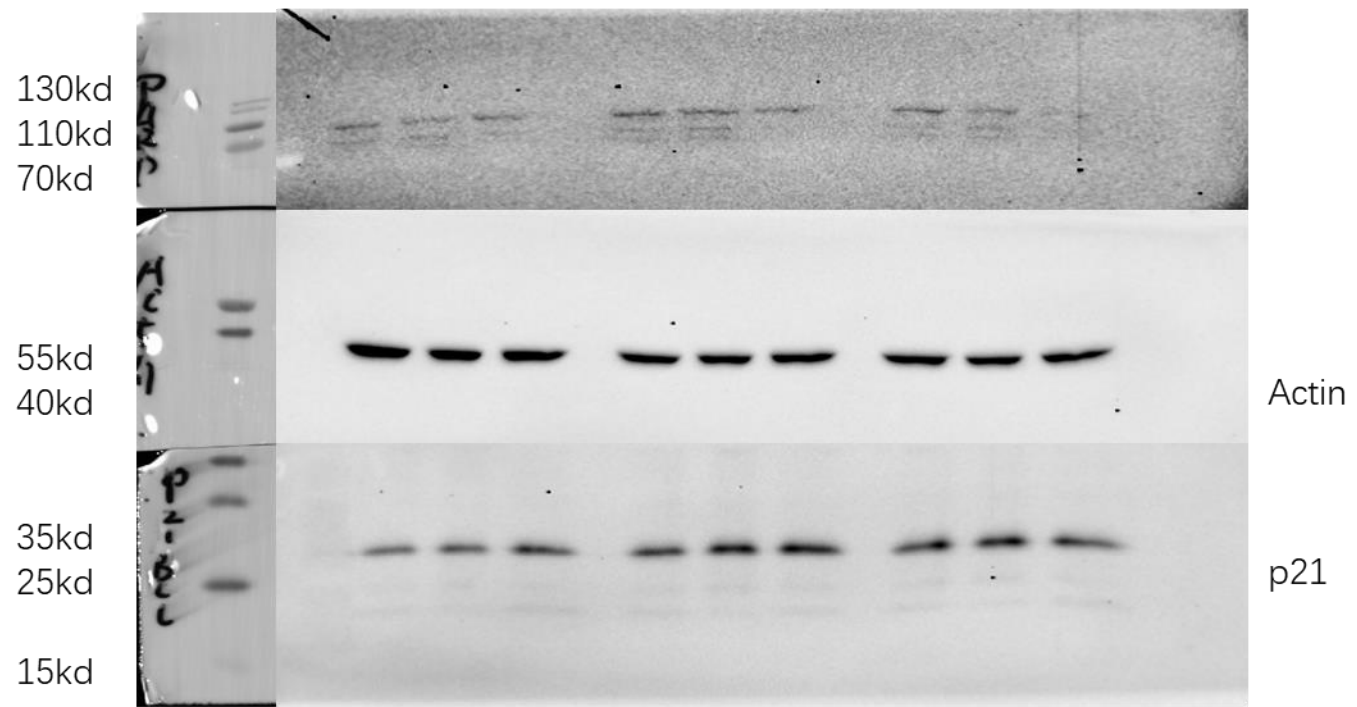

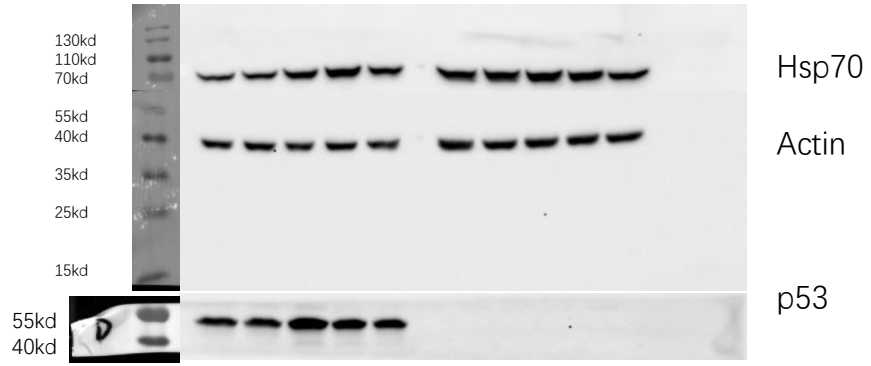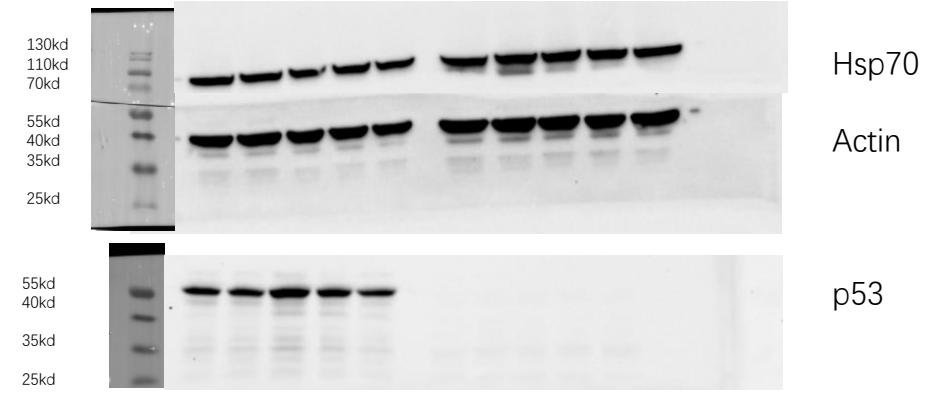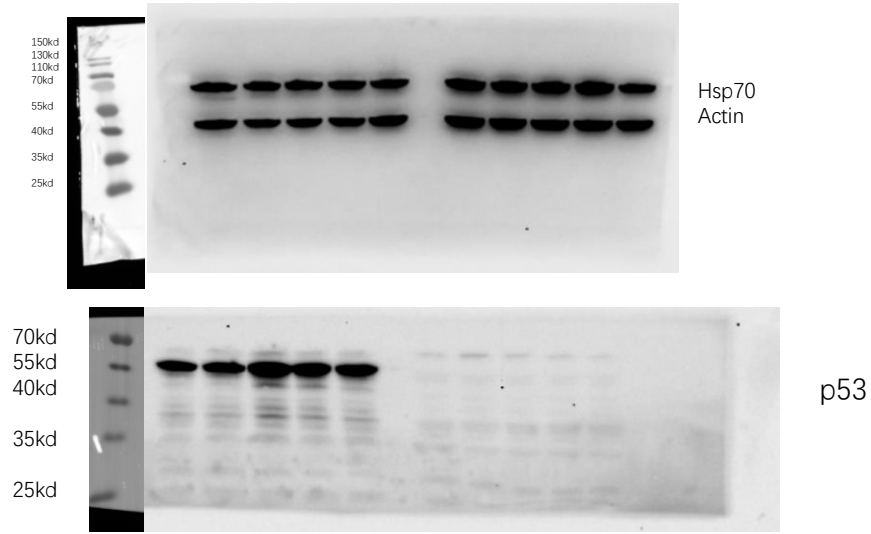

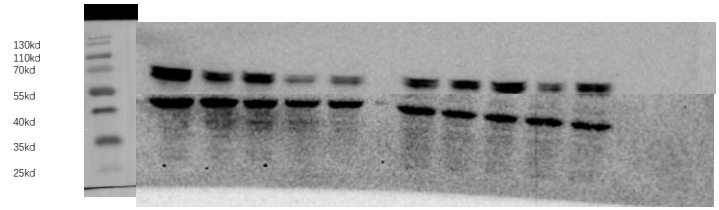

Keap1  
Actin

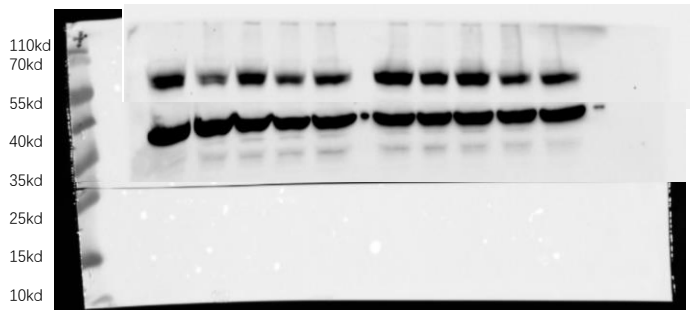

Keap1  
Actin

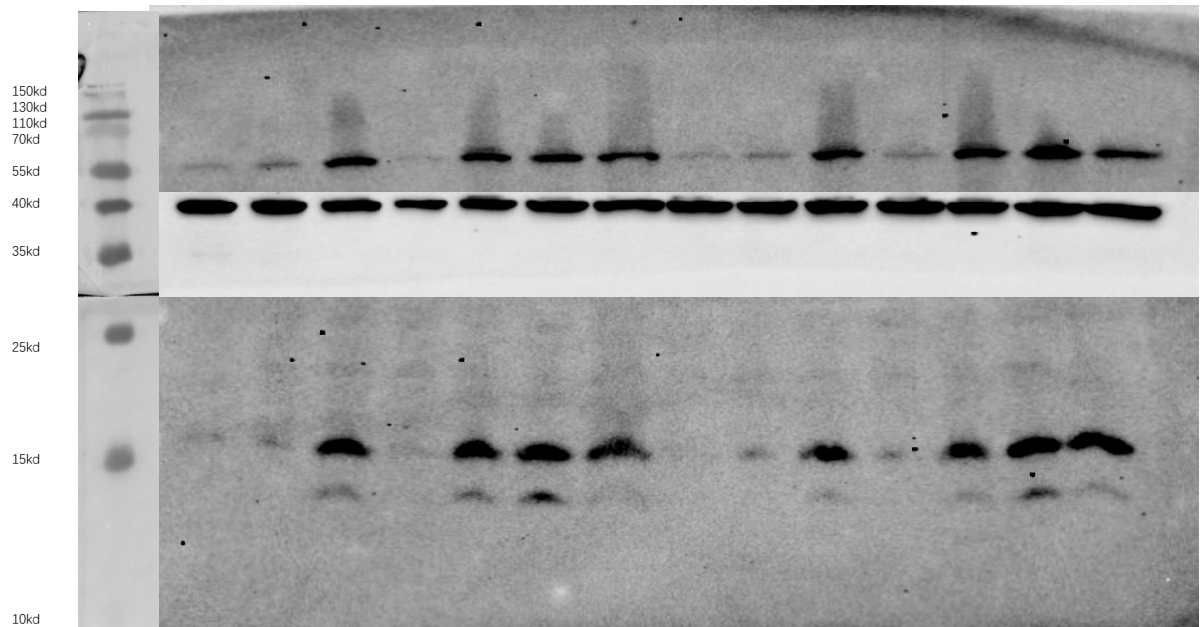

P62  
Actin  
LC3B

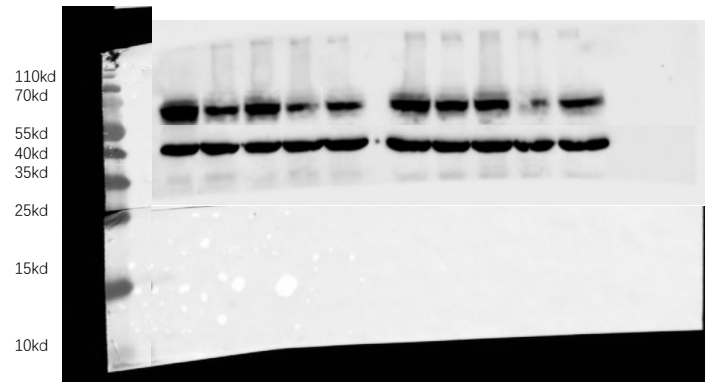

Keap1  
Actin

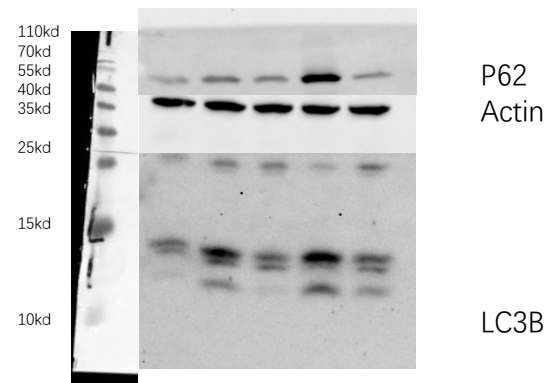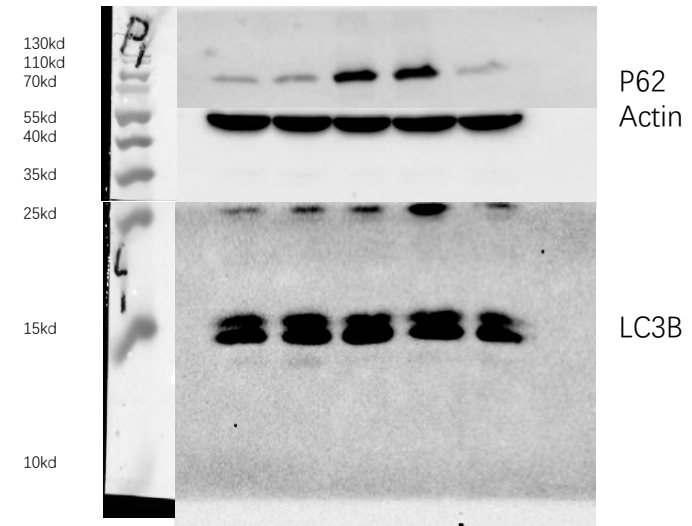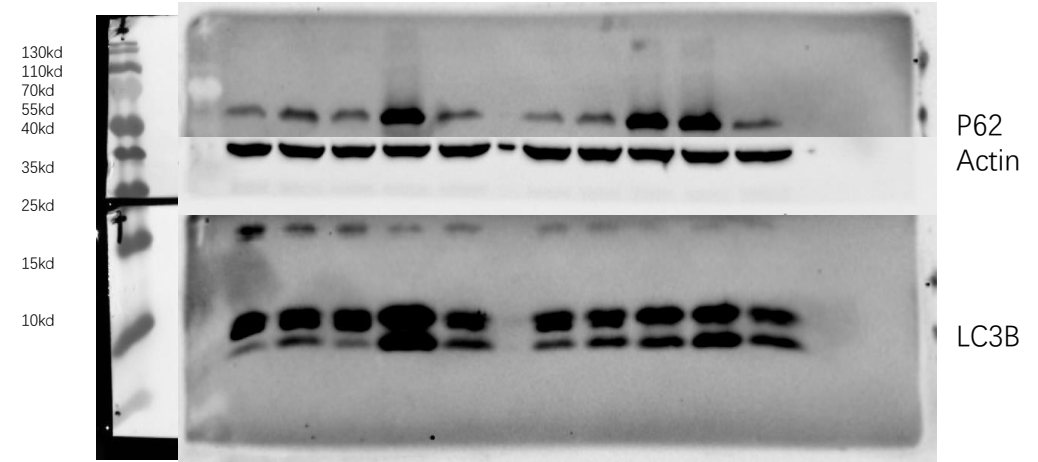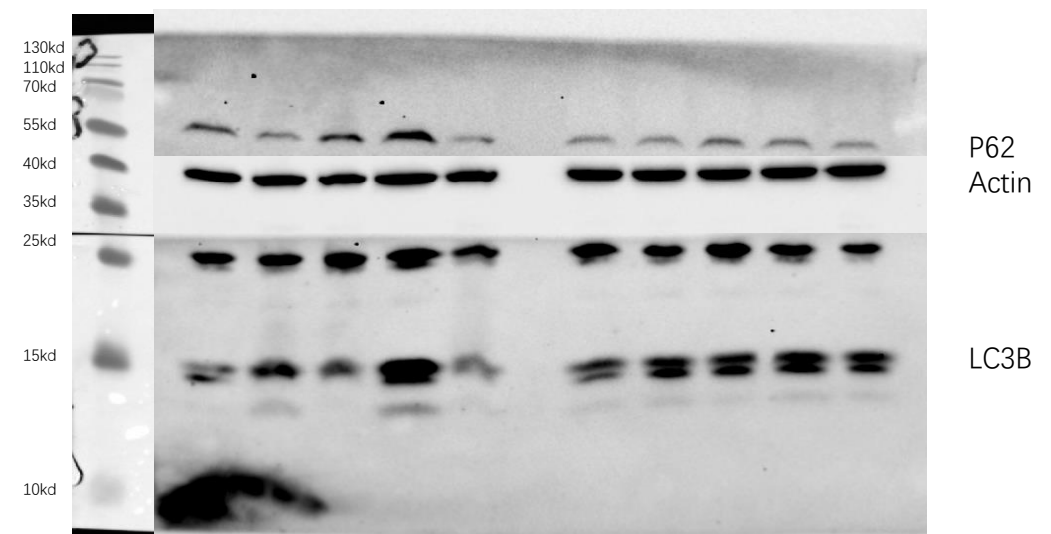

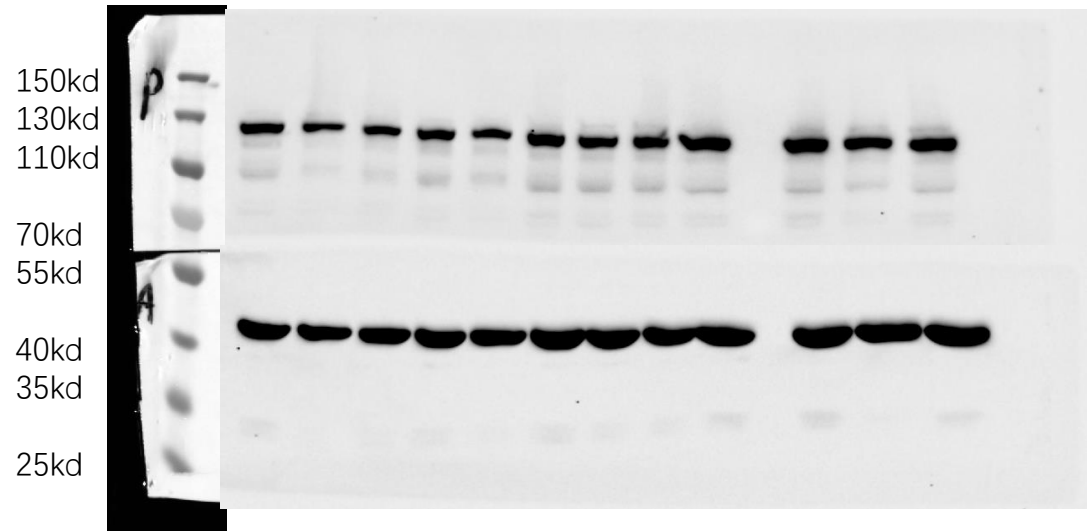

PARP1

Actin

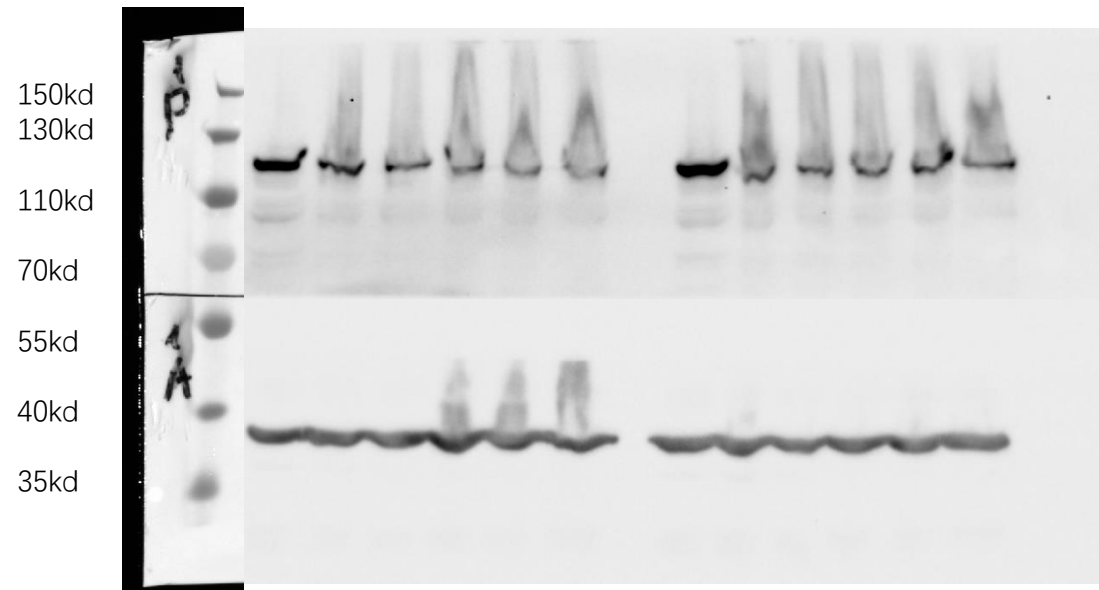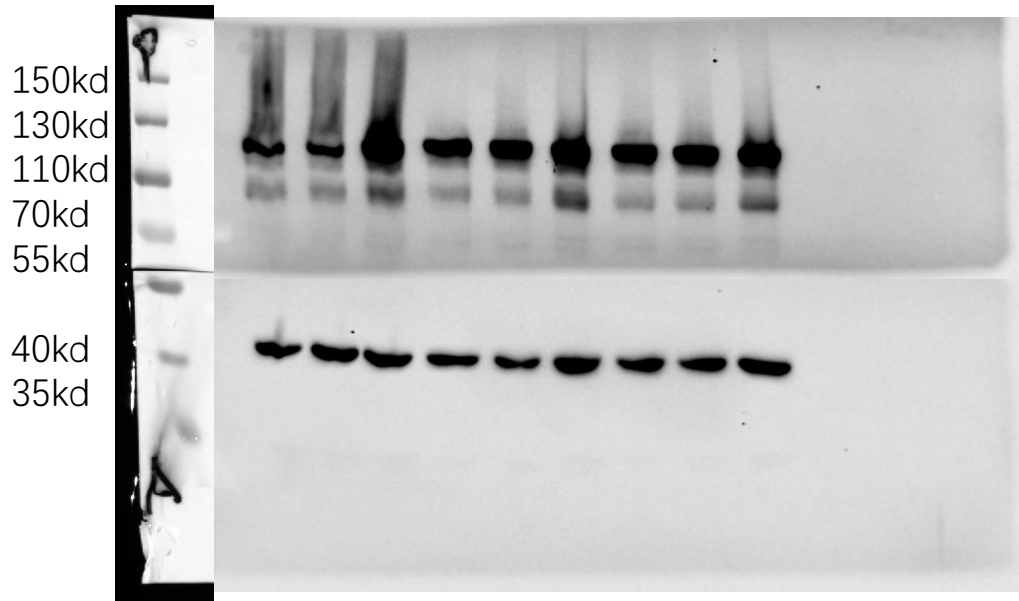

PARP1

Actin

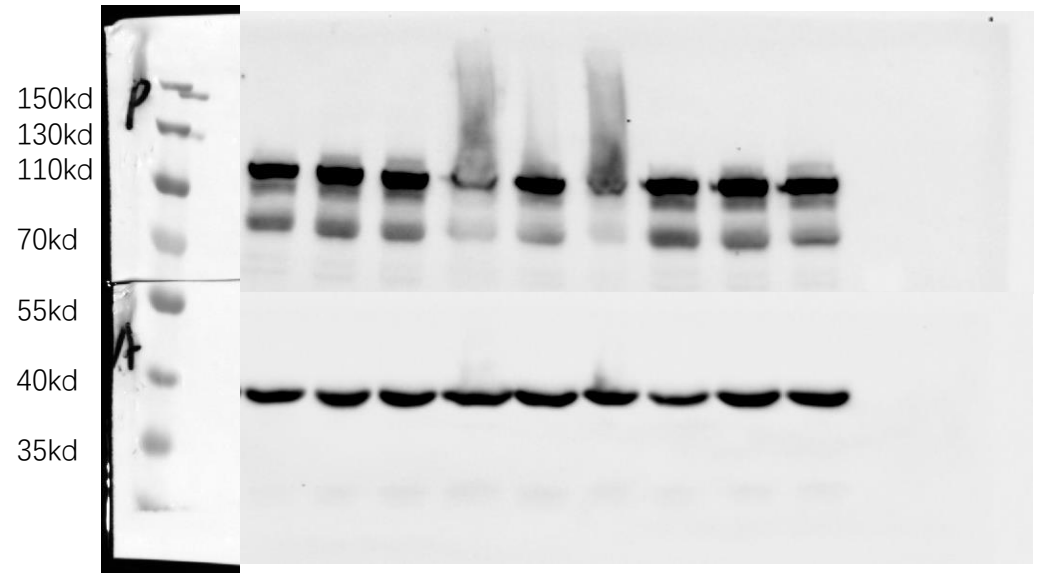

150kd  
130kd  
110kd

70kd  
55kd  
40kd  
35kd

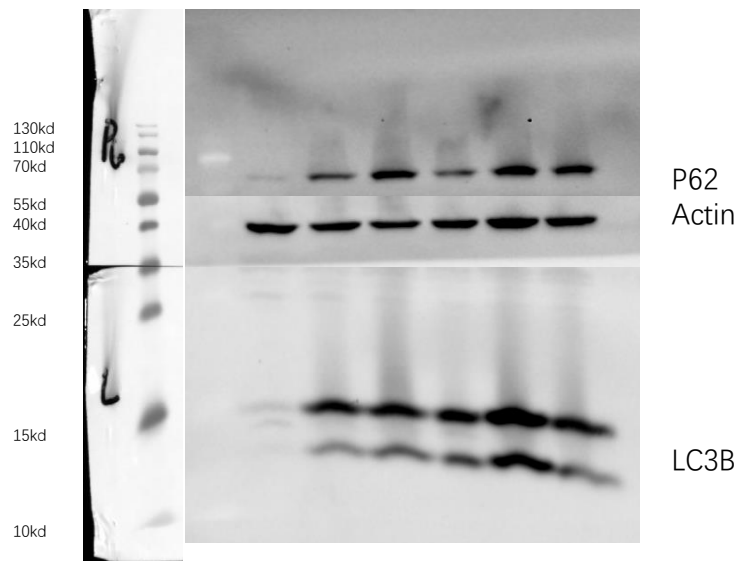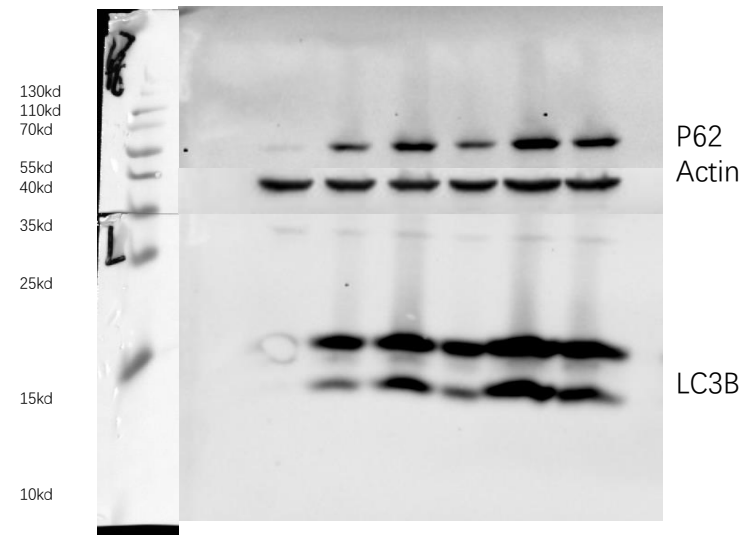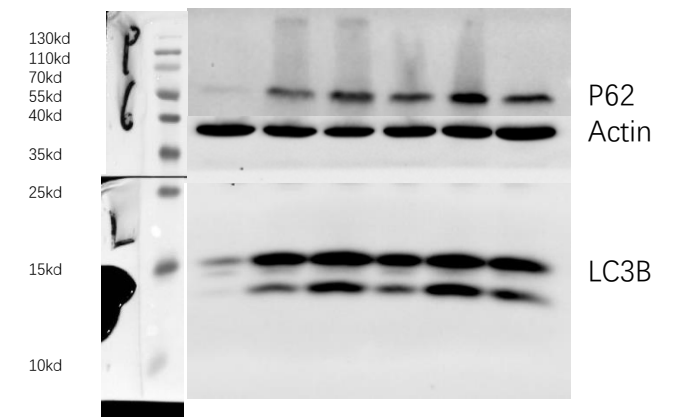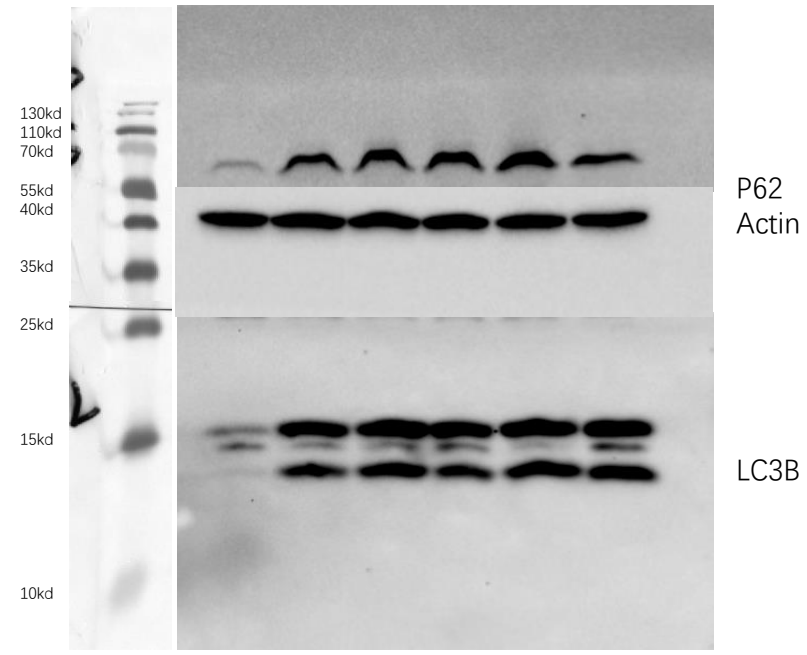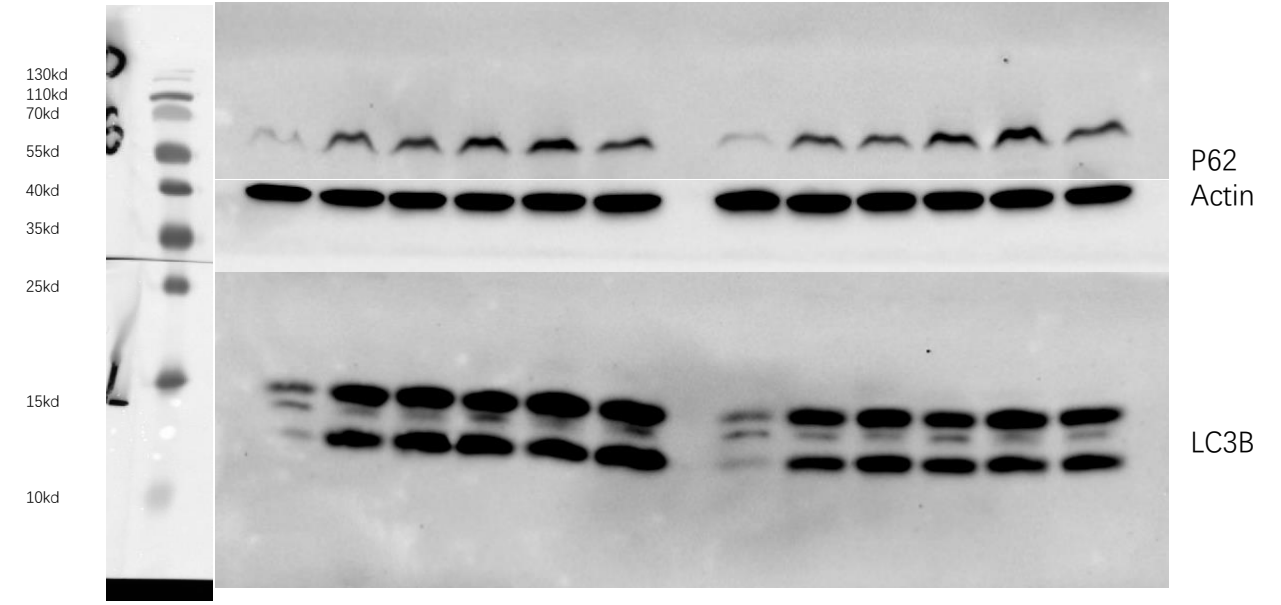

Supplement: MOESM1 [file 41420_2023_1578_MOESM1_ESM.pdf]
